# Supplementary material
Source: PubMed Central journal article supplement (PMC3059118)
Supplement: NIHMS241912-supplement-2.pdf [file NIHMS241912-supplement-2.pdf]

**Shultz et al.**  
**Supplemental Figure 1.**

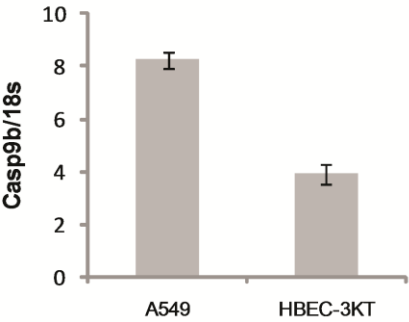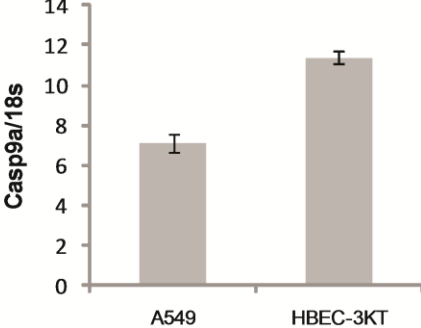

**Shultz et al.**  
**Supplemental Figure 2.**

**A**

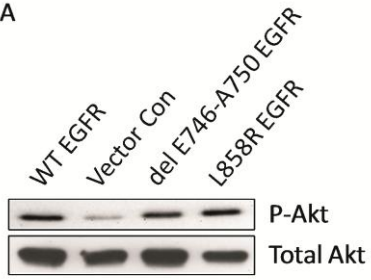

**B**

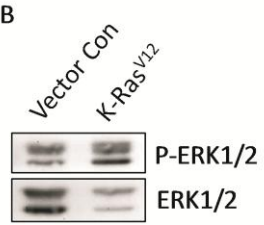

**Shultz et al.**  
**Supplemental Figure 3.**

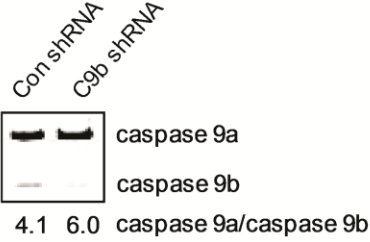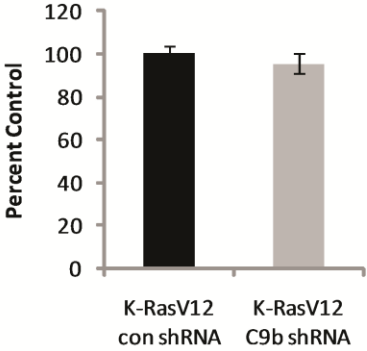

Shultz et al.  
Supplemental Figure 4.

**A**

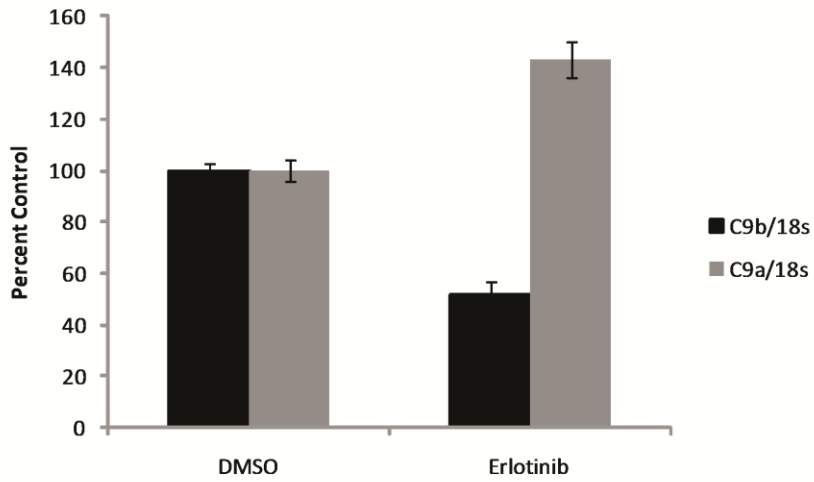

**B**

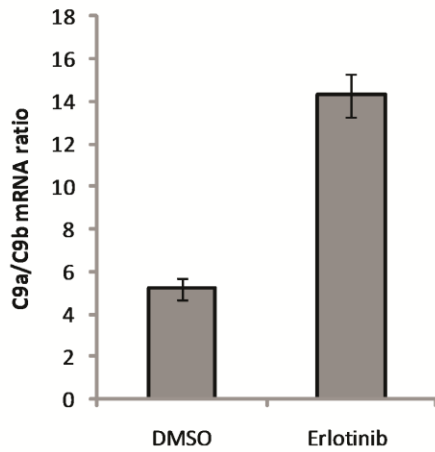

**C**

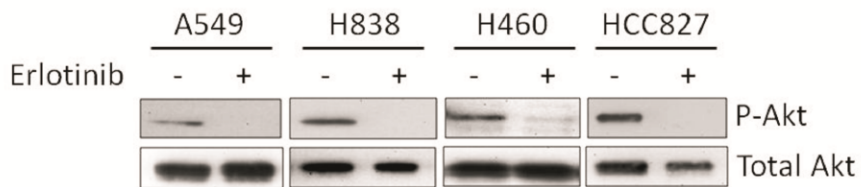

**Shultz et al.**  
**Supplemental Figure 5.**

**A**

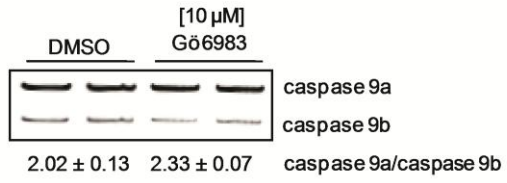

**B**

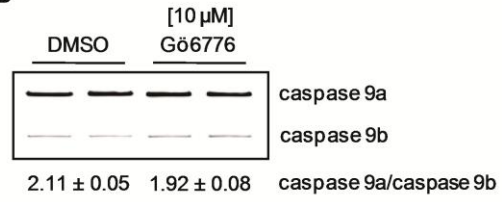

**Shultz et al.**  
**Supplemental Figure 6.**

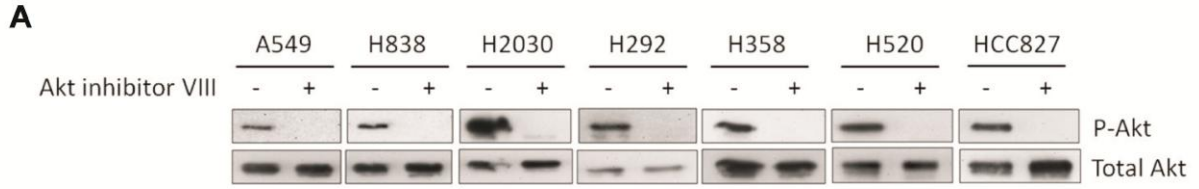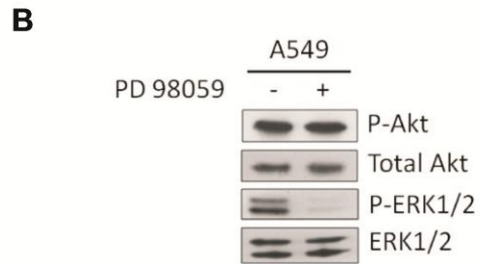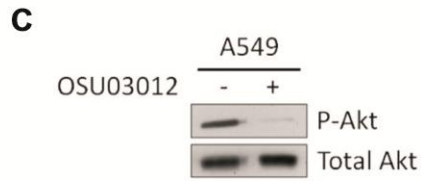

**Shultz et al.**  
**Supplemental Figure 7.**

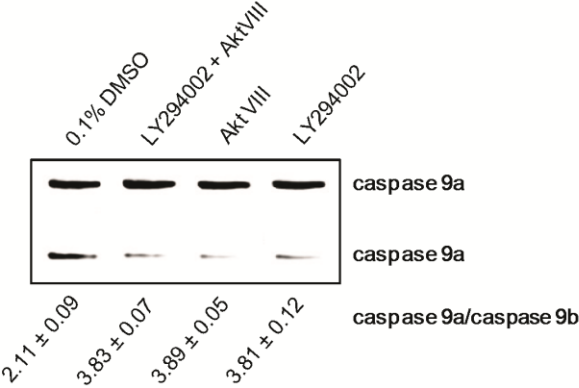

**Shultz et al.**  
**Supplemental Figure 8.**

**A**

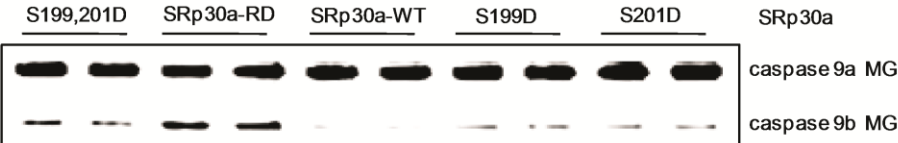

**B**

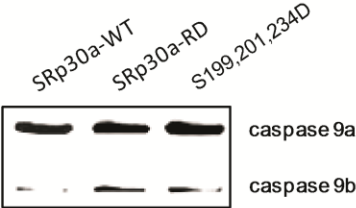



**Shultz et al.**  
**Supplemental Figure 9.**

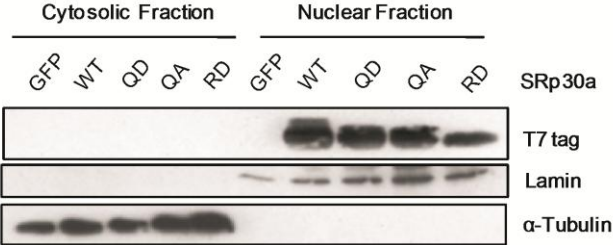

Shultz et al.  
Supplemental Figure 10.

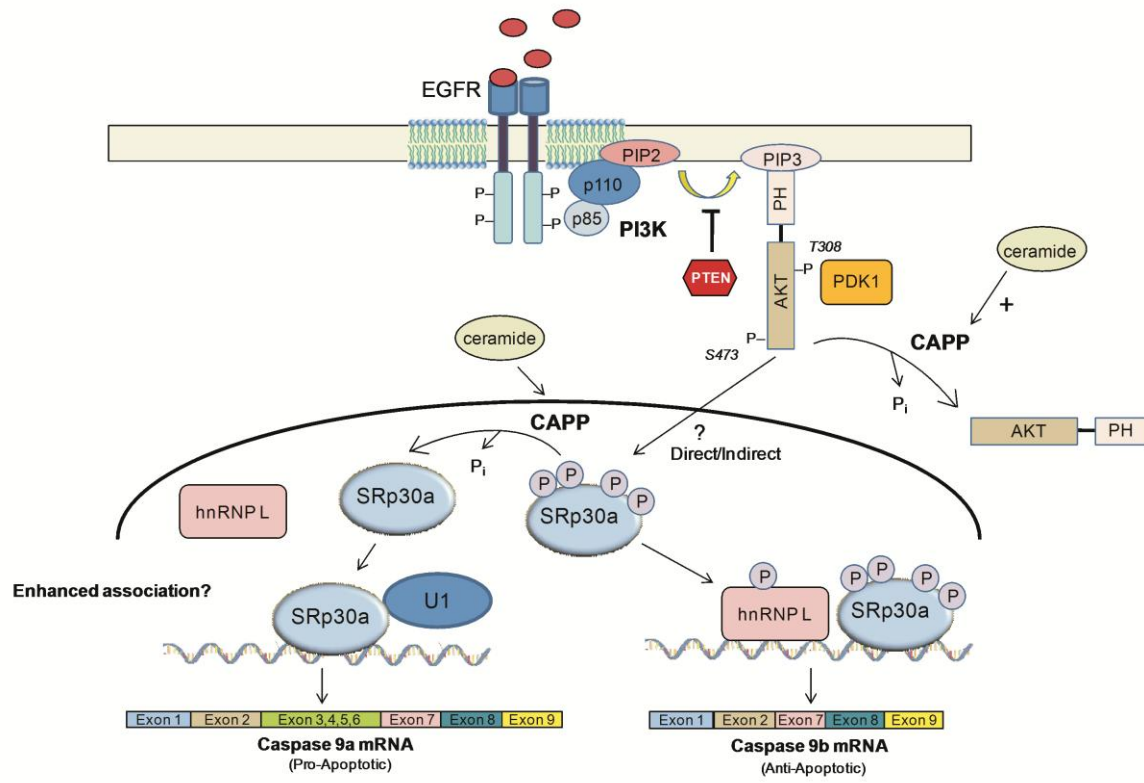

**Supplemental Table I.**

| <b>Pathology-verified patient tumor samples.</b> |                          |          |                     |                                                               |                              |          |                     |
|--------------------------------------------------|--------------------------|----------|---------------------|---------------------------------------------------------------|------------------------------|----------|---------------------|
| Sample                                           | Diagnosis                | Group    | Caspase 9a/9b ratio | Sample                                                        | Diagnosis                    | Group    | Caspase 9a/9b ratio |
| 1-I                                              | Normal                   | Normal   | 4.0                 | 37-II                                                         | Squamous cell carcinoma      | High     | 1.3                 |
| 2-I                                              | Normal                   | Normal   | 4.0                 | 38-II                                                         | Large cell carcinoma         | High     | 1.7                 |
| 3-I                                              | Normal                   | Normal   | 3.5                 | 3-III                                                         | Normal                       | Normal   | 3.9                 |
| 5-I                                              | Normal                   | Normal   | 4.0                 | 7-III                                                         | Normal                       | Normal   | 3.8                 |
| 6-I                                              | Normal                   | Normal   | 3.9                 | 9-III                                                         | Squamous cell carcinoma      | Normal   | 3.6                 |
| 7-I                                              | Normal                   | Normal   | 4.0                 | 10-III                                                        | Large cell carcinoma         | High     | 2.0                 |
| 9-I                                              | Squamous cell carcinoma  | High     | 2.0                 | 12-III                                                        | Bronchioloalveolar carcinoma | Normal   | 3.7                 |
| 11-I                                             | Squamous cell carcinoma  | Moderate | 3.0                 | 15-III                                                        | Squamous cell carcinoma      | Normal   | 4.5                 |
| 13-I                                             | Squamous cell carcinoma  | High     | 2.0                 | 16-III                                                        | Squamous cell carcinoma      | Moderate | 2.3                 |
| 14-I                                             | Large cell carcinoma     | Moderate | 2.3                 | 19-III                                                        | Large cell carcinoma         | High     | 1.0                 |
| 17-I                                             | Non-small cell carcinoma | High     | 2.0                 | 20-III                                                        | Non-small cell carcinoma     | High     | 2.0                 |
| 19-I                                             | Large cell carcinoma     | Moderate | 2.5                 | 23-III                                                        | Squamous cell carcinoma      | Moderate | 3.2                 |
| 20-I                                             | Squamous cell carcinoma  | High     | 1.0                 | 25-III                                                        | Squamous cell carcinoma      | Moderate | 2.7                 |
| 21-I                                             | Squamous cell carcinoma  | Normal   | 4.0                 | 27-III                                                        | Squamous cell carcinoma      | High     | 1.8                 |
| 24-I                                             | Squamous cell carcinoma  | Normal   | 3.7                 | 30-III                                                        | Squamous cell carcinoma      | Normal   | 4.0                 |
| 26-I                                             | Squamous cell carcinoma  | Moderate | 3.2                 | 31-III                                                        | Squamous cell carcinoma      | High     | 1.1                 |
| 28-I                                             | Large cell carcinoma     | Normal   | 3.4                 | 32-III                                                        | Squamous cell carcinoma      | Normal   | 3.5                 |
| 30-I                                             | Squamous cell carcinoma  | High     | 1.8                 | 33-III                                                        | Adenosquamous carcinoma      | High     | 1.7                 |
| 31-I                                             | Non-small cell carcinoma | Moderate | 3.0                 | 34-III                                                        | Large cell carcinoma         | High     | 0.9                 |
| 32-I                                             | Squamous cell carcinoma  | Moderate | 3.0                 | 39-III                                                        | Adenosquamous carcinoma      | Normal   | 3.7                 |
| 38-I                                             | Squamous cell carcinoma  | High     | 1.0                 | 43-III                                                        | Non-small cell carcinoma     | Normal   | 3.9                 |
| 40-I                                             | Squamous cell carcinoma  | Normal   | 4.0                 | 44-III                                                        | Non-small cell carcinoma     | High     | 1.6                 |
| 41-I                                             | Large cell carcinoma     | Normal   | 3.5                 | 45-III                                                        | Squamous cell carcinoma      | High     | 1.0                 |
| 43-I                                             | Squamous cell carcinoma  | Moderate | 2.3                 | <b>Matched-pair Analysis (Normal tissue vs. Tumor tissue)</b> |                              |          |                     |
| 44-I                                             | Squamous cell carcinoma  | Moderate | 2.6                 | 1-IV                                                          | Normal 1                     | Normal   | 4.0                 |
| 46-I                                             | Adenocarcinoma           | High     | 1.2                 | 2-IV                                                          | Squamous cell carcinoma 1    | High     | 0.9                 |
| 47-I                                             | Squamous cell carcinoma  | Moderate | 2.8                 | 5-IV                                                          | Normal 2                     | Moderate | 2.8                 |
| 48-I                                             | Non-small cell carcinoma | Moderate | 2.3                 | 6-IV                                                          | Large cell carcinoma 2       | High     | 1.8                 |
| 2-II                                             | Large cell carcinoma     | High     | 1.5                 | 9-IV                                                          | Normal 3                     | Normal   | 4.7                 |
| 6-II                                             | Squamous cell carcinoma  | High     | 2.0                 | 10-IV                                                         | Large cell carcinoma 3       | High     | 1.7                 |
| 10-II                                            | Large cell carcinoma     | Moderate | 2.6                 | 11-IV                                                         | Normal 4                     | Normal   | 3.7                 |
| 11-II                                            | Squamous cell carcinoma  | Moderate | 3.0                 | 12-IV                                                         | Large cell carcinoma 4       | Normal   | 3.7                 |
| 14-II                                            | Squamous cell carcinoma  | Moderate | 2.7                 | 17-IV                                                         | Normal 5                     | Normal   | 4.5                 |
| 17-II                                            | Squamous cell carcinoma  | High     | 2.0                 | 18-IV                                                         | Squamous cell carcinoma 5    | High     | 1.0                 |
| 18-II                                            | Squamous cell carcinoma  | High     | 1.1                 | 21-IV                                                         | Normal 6                     | Normal   | 4.0                 |
| 21-II                                            | Squamous cell carcinoma  | Moderate | 2.3                 | 22-IV                                                         | Non-small cell carcinoma 6   | High     | 2.1                 |
| 23-II                                            | Non-small cell carcinoma | Moderate | 2.3                 | 23-IV                                                         | Normal 7                     | Normal   | 3.8                 |
| 24-II                                            | Squamous cell carcinoma  | Moderate | 2.4                 | 24-IV                                                         | Squamous cell carcinoma 7    | Normal   | 3.5                 |
| 27-II                                            | Squamous cell carcinoma  | High     | 2.0                 | 25-IV                                                         | Normal 8                     | Normal   | 3.5                 |
| 31-II                                            | Squamous cell carcinoma  | Normal   | 4.5                 | 26-IV                                                         | Squamous cell carcinoma 8    | Moderate | 2.9                 |
| 32-II                                            | Squamous cell carcinoma  | Normal   | 3.6                 | 31-IV                                                         | Normal 9                     | Normal   | 3.6                 |
| 35-II                                            | Squamous cell carcinoma  | High     | 1.0                 | 32-IV                                                         | Squamous cell carcinoma 9    | Moderate | 2.4                 |
| 36-II                                            | Squamous cell carcinoma  | High     | 1.1                 |                                                               |                              |          |                     |

**Supplemental Table II. Characterization of NSCLC cell lines**

| <b>Cell line</b> | <b>NSCLC Histology</b> | <b>Mutational Status</b>              | <b>Caspase 9a/9b ratio</b> | <b>Degree of Dysregulation</b> |
|------------------|------------------------|---------------------------------------|----------------------------|--------------------------------|
| A549             | AD                     | WT p53, K-Ras <sup>V12</sup> mutation | 1.92 ± 0.16                | H                              |
| H520             | SQ                     | p53 mutation, WT Ras                  | 2.25 ± 0.15                | H                              |
| H1703            | ADSQ                   | p53 mutation, WT Ras                  | 3.32 ± 0.08                | N                              |
| H292             | SQ                     | WT p53, WT Ras                        | 1.72 ± 0.20                | H                              |
| H2030            | AD                     | WT p53, K-Ras <sup>V12</sup> mutation | 2.06 ± 0.11                | H                              |
| H838             | AD                     | p53 mutation, WT Ras                  | 1.42 ± 0.18                | H                              |
| H596             | ADSQ                   | p53 mutation, WT Ras                  | 2.73 ± 0.09                | M                              |
| H2170            | SQ                     | p53 mutation, WT Ras                  | 3.65 ± 0.09                | N                              |
| H2347            | AD                     | WT p53, N-Ras mutation                | 3.68 ± 0.10                | N                              |
| H226             | SQ                     | WT p53, WT Ras                        | 2.15 ± 0.12                | H                              |
| H358             | BA                     | WT p53, K-Ras <sup>V12</sup> mutation | 3.02 ± 0.16                | M                              |

AD, adeno carcinoma; SQ, squamous cell carcinoma; ADSQ, adenosquamous cell carcinoma; BA, Bronchioalveolar carcinoma; H, highly dysregulated; M, moderately dysregulated; N, normal.

**Supplemental Table III. Mitogen signaling pathways demonstrating no involvement in the alternative splicing of caspase 9 as analyzed by small molecule inhibitors.**

| <b>Mitogenic Pathways Investigated</b>   | <b>Inhibitor</b>       | <b>Concentration</b> |
|------------------------------------------|------------------------|----------------------|
| Mitogen Activated Protein Kinase (MAPK)  | U0126                  | 10 $\mu$ M           |
|                                          | PD98059                | 10 $\mu$ M           |
|                                          | SB202190               | 10 $\mu$ M           |
| Rho Kinase (ROCK)                        | Y-27632                | 10 $\mu$ M           |
| Casein Kinase (CK)                       | DMAT                   | 10 $\mu$ M           |
| Src Family Tyrosine Kinases              | Src Kinase Inhibitor I | 25 $\mu$ M           |
| Protein Kinase C                         | Gö6983                 | 10 $\mu$ M           |
|                                          | Gö6976                 | 10 $\mu$ M           |
| mTOR                                     | Rapamycin              | 10 $\mu$ M           |
| Glycogen Synthase Kinase (GSK)           | SB216763               | 10 $\mu$ M           |
| c-Jun-N-Terminal Kinase (JNK/SAP Kinase) | JNK Inhibitor II       | 10 $\mu$ M           |

**Supplemental Table IV.** Potential phosphorylation sites in SRp30a involved in regulating the alternative splicing of caspase 9.

| <b>Possible phosphosite</b> | <b>Determination</b>   | <b>ESI-LC-MS/MS confirmed</b> | <b>Affect on C9a/C9b ratio</b> |
|-----------------------------|------------------------|-------------------------------|--------------------------------|
| S199                        | Mass Spectrometry      | Yes                           | Yes                            |
| S201                        | Mass Spectrometry      | Yes                           | Yes                            |
| S205                        | Mass Spectrometry      | Yes                           | No                             |
| S221                        | Kinase site prediction | No                            | No                             |
| S225                        | Mass Spectrometry      | Yes                           | No                             |
| S227                        | Mass Spectrometry      | Yes                           | Yes                            |
| S231                        | Mass Spectrometry      | Yes                           | No                             |
| S234                        | Mass Spectrometry      | Yes                           | Yes                            |
| S238                        | Mass Spectrometry      | Yes                           | No                             |
| S242                        | Mass Spectrometry      | Yes                           | No                             |
| S244                        | Mass Spectrometry      | Yes                           | No                             |
| S246                        | Kinase site prediction | No                            | No                             |
| T248                        | Kinase site prediction | No                            | No                             |
